# Supplementary material
Source: HighWire-hosted journal article supplement (http://www.ajnr.org/highwire/filestream/52442/field_highwire_adjunct_files/0/3363_tables.pdf)
Supplement: 3363_tables.pdf [file 3363_tables.pdf]

**On-line Table 1: Nonserious adverse events within 1 month of surgery**

| No. of Patients                                 | CF<br>(n = 57) | IBTF<br>(n = 55) |
|-------------------------------------------------|----------------|------------------|
| With adverse events within 1 month <sup>a</sup> | 12             | 11               |
| Ear and labyrinth disorders                     |                |                  |
| Vertigo                                         | 0              | 1                |
| Gastrointestinal disorders                      |                |                  |
| Abdominal pain                                  | 1              | 0                |
| Constipation                                    | 0              | 1                |
| Diarrhea                                        | 0              | 1                |
| Gastritis                                       | 1              | 0                |
| Vomiting                                        | 2 <sup>b</sup> | 0                |
| General disorders                               |                |                  |
| Adverse drug reaction                           | 1              | 0                |
| Infections                                      |                |                  |
| Helicobacter gastritis                          | 0              | 1                |
| Urinary tract infection                         | 0              | 1                |
| Injury, procedural complications                |                |                  |
| Incision site pain                              | 1              | 0                |
| Hematoma                                        | 0              | 1 <sup>c</sup>   |
| Procedural pain                                 | 0              | 1                |
| Musculoskeletal disorders                       |                |                  |
| Arthralgia                                      | 1 <sup>d</sup> | 0                |
| Back pain                                       | 1              | 2                |
| Musculoskeletal pain                            | 0              | 1                |
| Pain in extremity                               | 1              | 0                |
| Nervous system disorders                        |                |                  |
| Confusion postoperatively                       | 2 <sup>e</sup> | 0                |
| Headache                                        | 2              | 1 <sup>f</sup>   |
| Psychiatric disorders                           | 1              | 1                |
| Vascular disorders                              |                |                  |
| Hypertension                                    | 0              | 1                |

**Note:**—MedDRA indicates the Medical Dictionary for Regulatory Activities.

<sup>a</sup> Patients may have had multiple adverse events; all MedDRA categories and lower level terms are listed for adverse events occurring within 1 month.

<sup>b</sup> One event was considered possibly anesthesia-related.

<sup>c</sup> Event was considered possibly related to device.

<sup>d</sup> Event was not serious and considered possibly anesthesia-related.

<sup>e</sup> Both were not serious and possibly related to anesthesia.

<sup>f</sup> One event was not serious and possibly anesthesia-related.

**On-line Table 2: Serious adverse events within 1 month of surgery**

| No. of Patients                                         | CF<br>(n = 57) | IBTF<br>(n = 55) |
|---------------------------------------------------------|----------------|------------------|
| With serious adverse events within 1 month <sup>a</sup> | 5              | 8                |
| Cardiac disorders                                       |                |                  |
| Atrial fibrillation                                     | 1              | 0                |
| Gastrointestinal disorders                              |                |                  |
| Abdominal pain                                          | 0              | 1                |
| Infections                                              |                |                  |
| Diverticulitis                                          | 0              | 1                |
| Lung infection                                          | 0              | 1 <sup>b</sup>   |
| Pneumonia                                               | 1 <sup>b</sup> | 0                |
| Septic shock                                            | 1 <sup>b</sup> | 0                |
| Urinary tract infection                                 | 0              | 1                |
| Musculoskeletal disorders                               |                |                  |
| Back pain                                               | 0              | 2                |
| Symptomatic vertebral fracture                          | 1              | 1                |
| Neoplasms                                               |                |                  |
| Spinal meningioma benign                                | 0              | 1                |
| Psychiatric disorders                                   |                |                  |
| Psychiatric decompensation                              | 1              | 0                |
| Reproductive disorders                                  |                |                  |
| Benign prostatic hyperplasia                            | 0              | 1                |

**Note:**—MedDRA indicates the Medical Dictionary for Regulatory Activities.

<sup>a</sup> Patients may have had multiple serious adverse events. All MedDRA categories and lower level terms are listed for adverse events occurring within 1 month; an adverse event was serious if it resulted in death, life-threatening injury, or permanent impairment or if it required extended hospital stay or intervention to prevent impairment.

No serious adverse events were related to device or procedure.

<sup>b</sup> Event resulted in death.
